# Supplementary material for: Evaluation of circulating tumor cells as a prognostic biomarker for early recurrence in stage II–III breast cancer patients using CytoSorter® system: a retrospective study
Source: PeerJ. 2021 Apr 29;9:e11366. doi: 10.7717/peerj.11366 (PMC8088762; doi:10.7717/peerj.11366)
Supplement: Supplemental Information 1 — Deidentified patient demographics and clinical characteristics and follow-up information [file peerj-09-11366-s001.xlsx]

## Sheet: Enrolled Patients
Patirnt No.	Chart ID	Age	Age > = 54	TNM STage	T stage	N stage	Differentiation	ER	PR	HER-2	Menopause	CTC Count	RFS (days)	Chemo	Radio	Endocrine	Tageted	Recurrence	D-REcurrence
		56	1	2	2	0	3	1	1	1	1	0	585	0	0	1	1	0	0
		67	1	2	1	1	3	1	1	0	1	1	632	0	1	1	0	0	0
		63	1	2	2	0	3	1	1	0	1	2	570	0	0	1	0	0	0
		55	1	2	2	0	2	1	1	0	1	2	612	0	0	1	0	0	0
		45	0	2	2	0	1	0	0	0	0	3	723	0	0	0	0	0	0
		53	0	3	3	1	1	1	0	1	1	5	357	0	0	1	0	1	0
		50	0	2	2	0	1	1	1	1	0	0	536	1	1	1	1	0	0
		34	0	3	2	2	1	1	1	0	0	0	594	1	1	1	0	0	0
		53	0	2	1	1	3	1	1	0	0	0	662	1	1	1	0	0	0
		47	0	2	2	0	2	0	0	0	0	1	506	1	0	0	0	0	0
		66	1	2	2	0	3	1	0	0	1	1	525	1	0	1	0	0	0
		63	1	2	1	1	3	0	0	1	1	1	549	1	1	1	1	0	0
		45	0	2	2	0	3	1	1	0	0	1	550	1	0	0	0	0	0
		46	0	2	2	0	2	1	1	0	0	1	553	1	0	1	0	0	0
		38	0	2	2	1	2	1	1	0	0	1	469	1	1	1	0	1	1
		70	1	2	2	2	2	1	1	0	1	2	480	1	0	1	0	0	0
		58	1	3	2	2	3	0	0	1	1	2	485	1	0	1	1	0	0
		69	1	2	2	1	1	1	1	0	1	2	508	1	1	1	0	0	0
		62	1	2	1	1	2	1	0	0	1	2	631	1	1	1	0	0	0
		45	0	2	2	0	1	0	0	0	0	2	268	1	1	0	0	1	1
		49	0	2	2	1	1	0	0	0	0	3	442	1	0	0	0	0	0
		47	0	2	2	0	2	1	1	0	0	3	463	1	0	1	0	0	0
		56	1	2	2	1	1	0	0	0	1	3	472	1	1	0	0	0	0
		44	0	2	2	1	2	1	1	0	0	3	532	1	0	0	0	0	0
		57	1	2	2	0	1	1	1	0	1	3	690	1	0	1	0	0	0
		57	1	2	2	0	3	1	0	0	1	3	709	1	1	1	0	0	0
		56	1	3	2	3	1	1	1	1	1	3	274	1	1	1	1	1	1
		53	0	2	2	1	2	1	0	0	1	3	456	1	1	1	0	1	0
		56	1	2	2	1	1	1	1	0	1	4	562	1	1	1	0	0
		45	0	3	2	2	3	1	0	1	0	4	675	1	0	1	1	0	0
		48	0	3	3	1	3	1	1	1	1	4	128	1	1	1	0	1	1
		46	0	3	2	2	1	1	1	1	0	4	166	1	1	1	1	1	1
		41	0	2	2	0	1	1	1	0	0	4	335	1	1	1	0	1	1
		62	1	2	2	0	1	0	0	1	1	5	718	1	0	1	1	0	0
		46	0	2	1	1	2	1	1	0	1	6	676	1	1	1	0	0	0
		61	1	3	1	3	2	0	0	0	1	8	566	1	1	0	0	1	1
		53.0278											518.306
